# Supplementary material for: Contribution of low-frequency climatic–oceanic oscillations to streamflow variability in small, coastal rivers of the Sierra Nevada de Santa Marta (Colombia)
Source: Copernicus journal article supplement (doi:10.5194/hess-23-2379-2019), 2019-05-16
Supplement: Supplementary file 1 [file hess-23-2379-2019-supplement.pdf]

Supplement of Hydrol. Earth Syst. Sci., 23, 2379–2400, 2019  
<https://doi.org/10.5194/hess-23-2379-2019-supplement>  
© Author(s) 2019. This work is distributed under  
the Creative Commons Attribution 4.0 License.

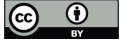

*Supplement of*

## **Contribution of low-frequency climatic–oceanic oscillations to streamflow variability in small, coastal rivers of the Sierra Nevada de Santa Marta (Colombia)**

**Juan Camilo Restrepo et al.**

*Correspondence to:* Juan Camilo Restrepo (restrepocj@uninorte.edu.co)

The copyright of individual parts of the supplement might differ from the CC BY 4.0 License.

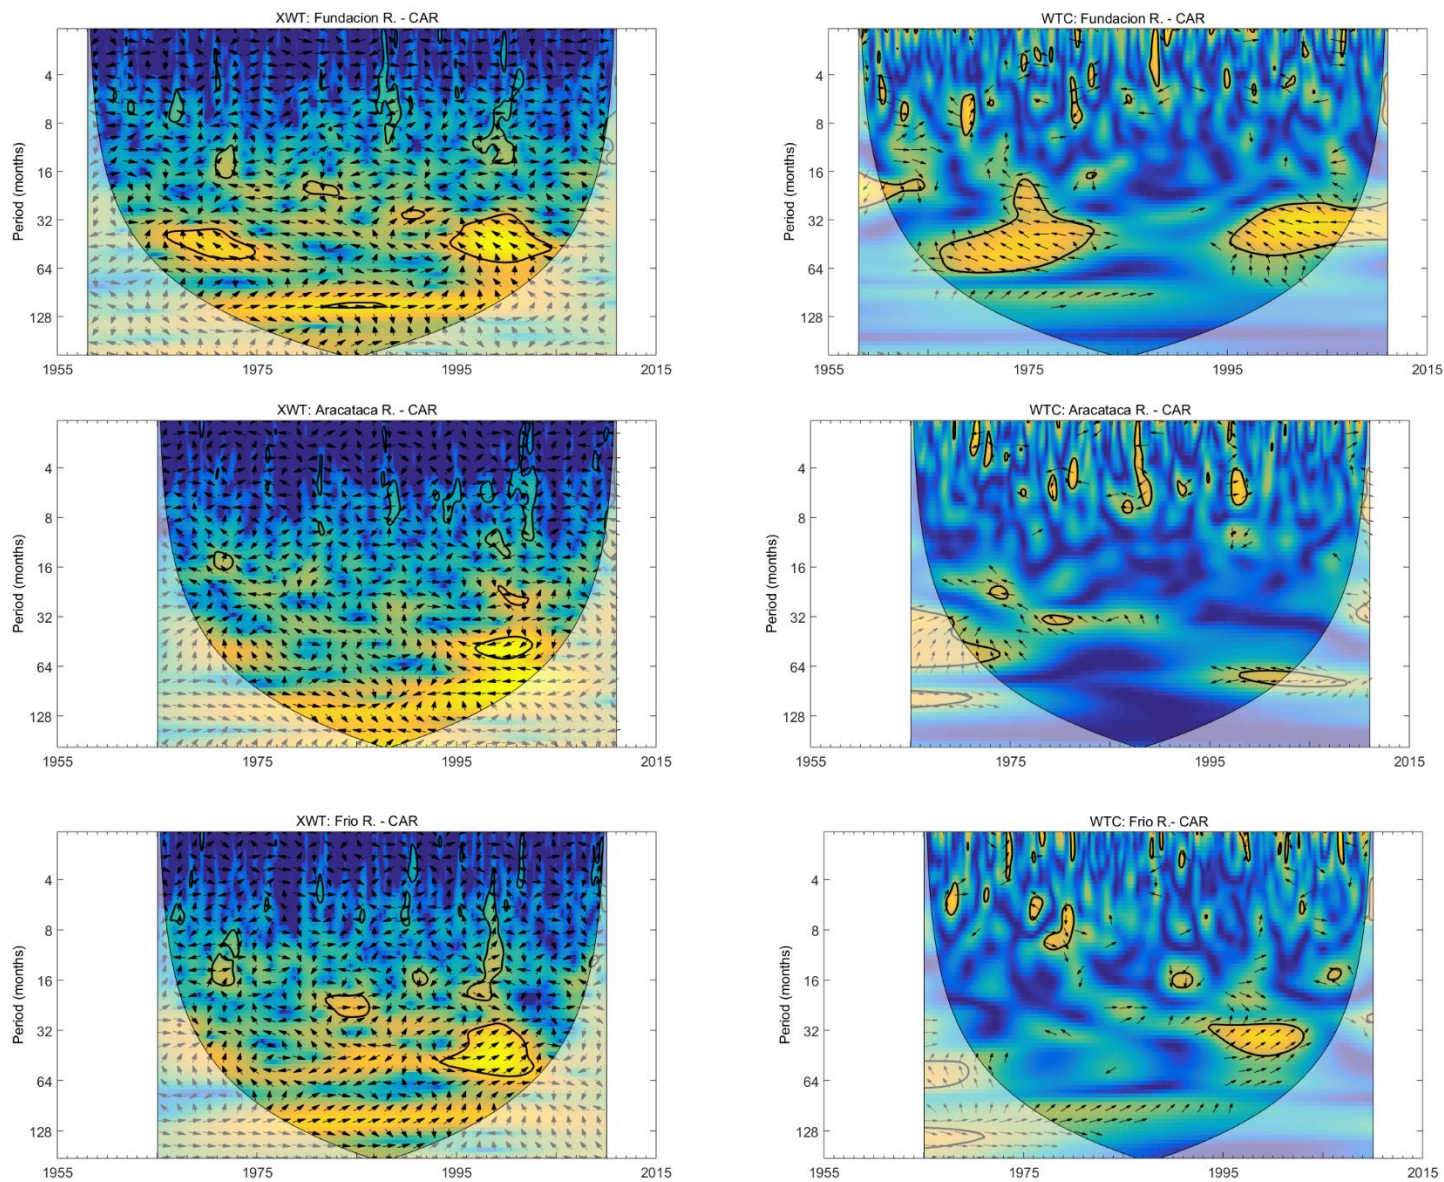

**Fig. S1.** Cross Wavelet Transform (XWT) and Wavelet Coherence (WTC) between CAR and the Fundación, Aracataca, and Frío rivers.

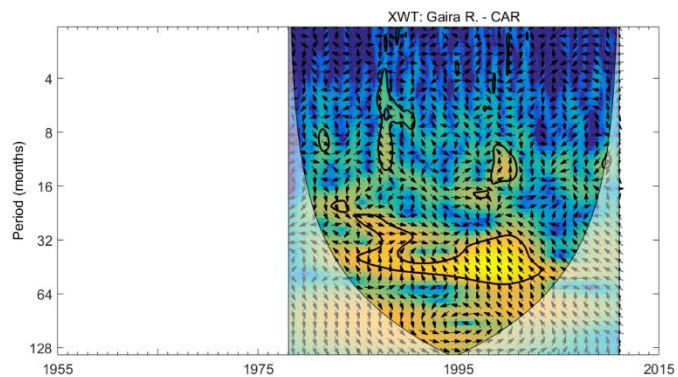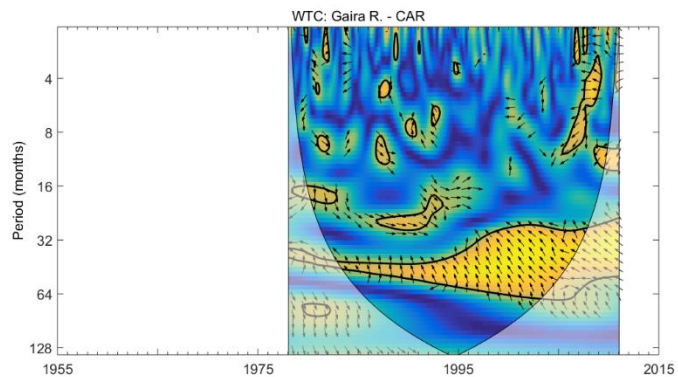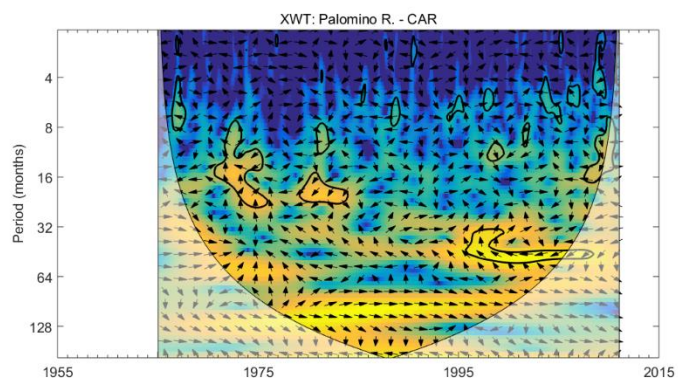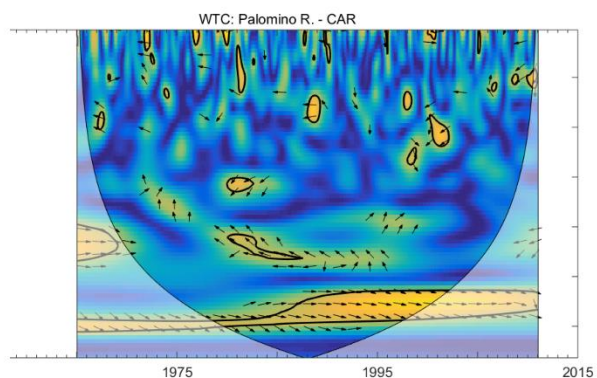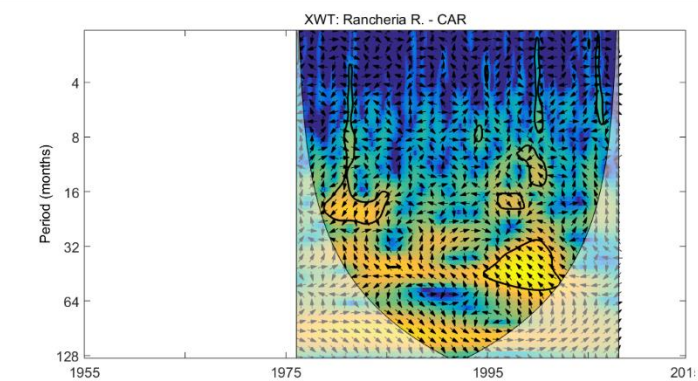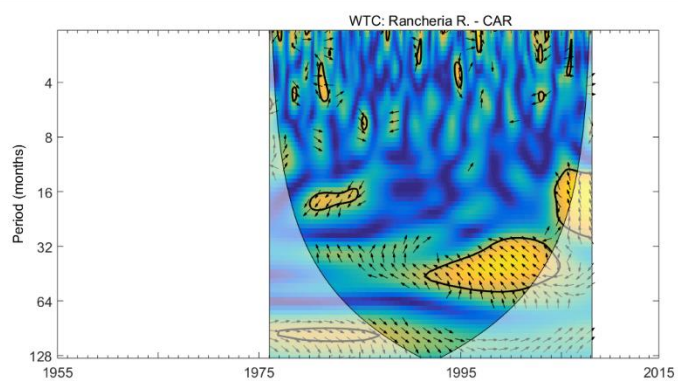

**Fig. S2.** Cross Wavelet Transform (XWT) and Wavelet Coherence (WTC) between CAR and the Gaira, Palomino, and Ranchería rivers.

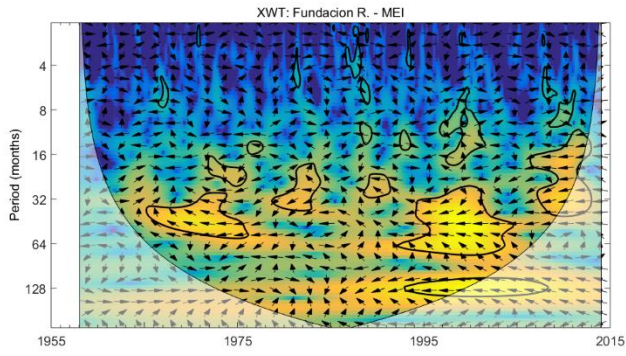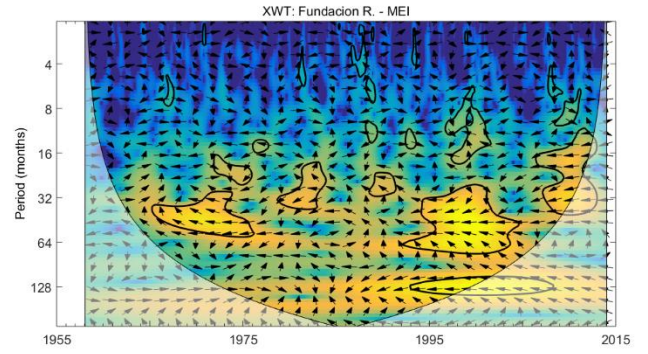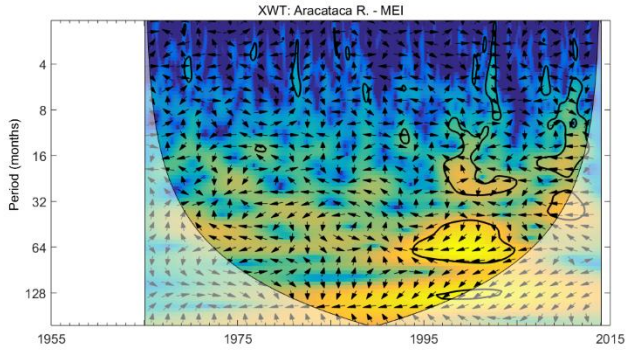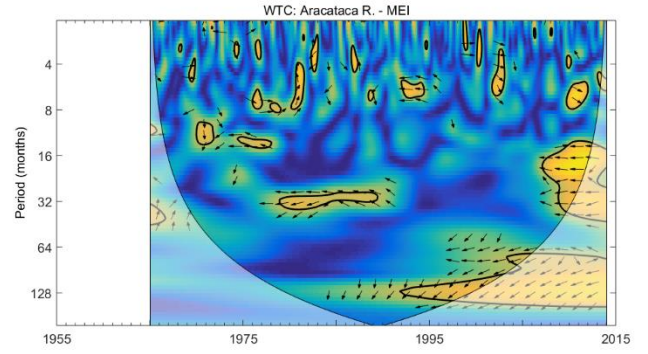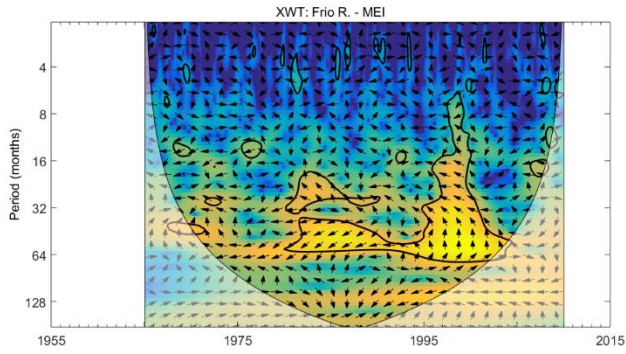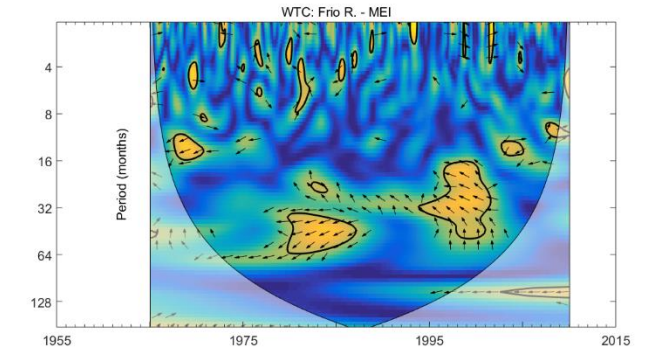

**Fig. S3.** Cross Wavelet Transform (XWT) and Wavelet Coherence (WTC) between MEI and the Fundación, Aracataca, and Frío rivers.

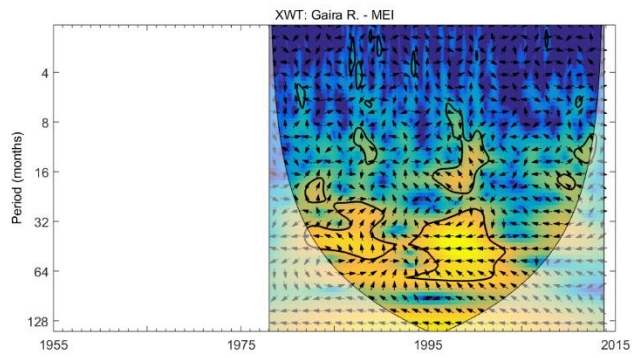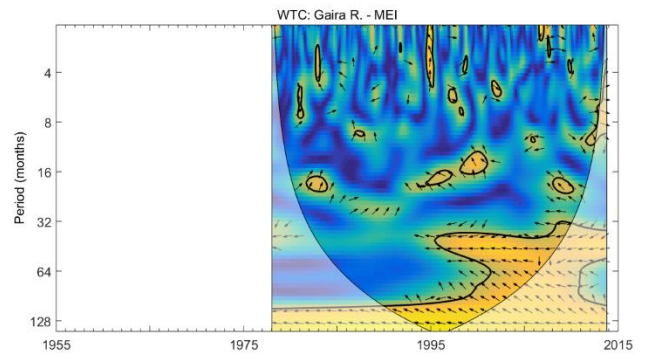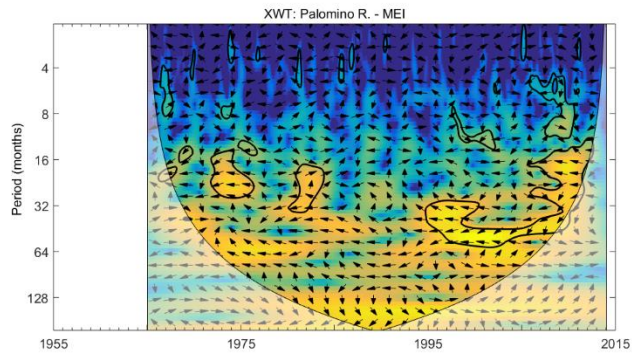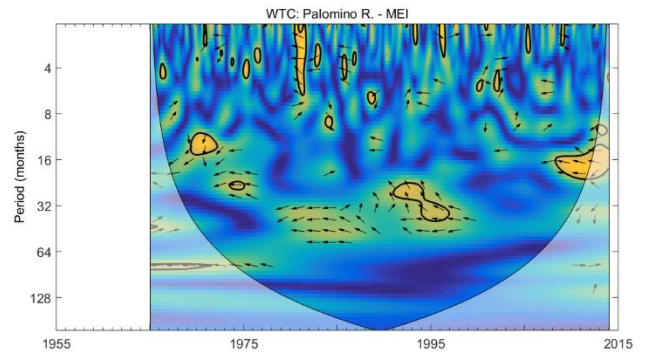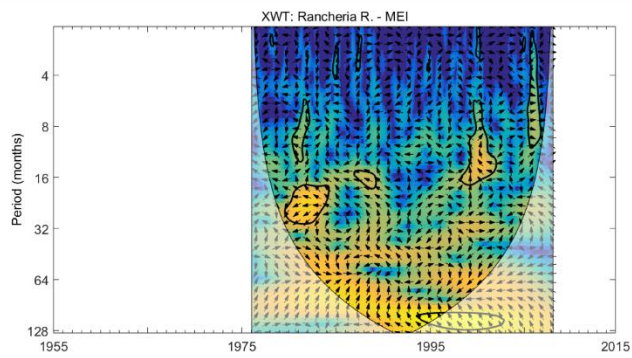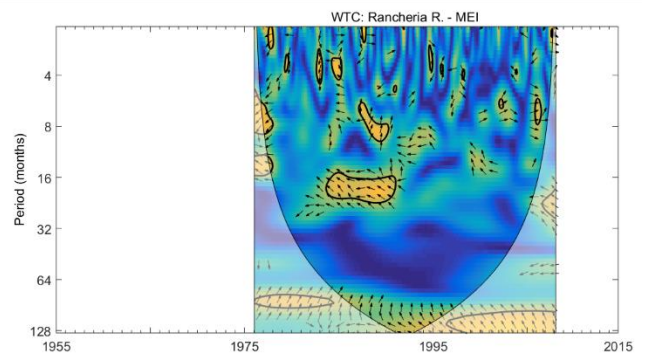

**Fig. S4.** Cross Wavelet Transform (XWT) and Wavelet Coherence (WTC) between MEI and the Gaira, Palomino, and Ranchería rivers.

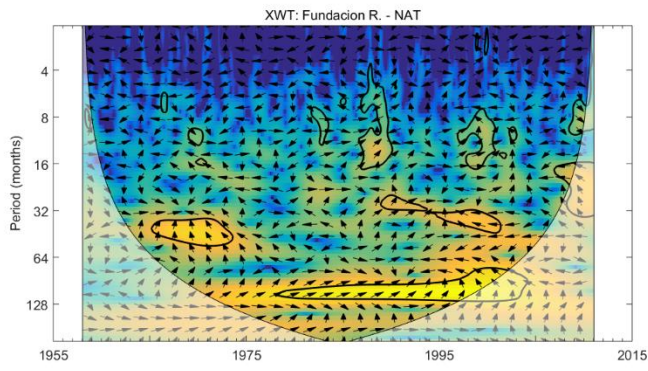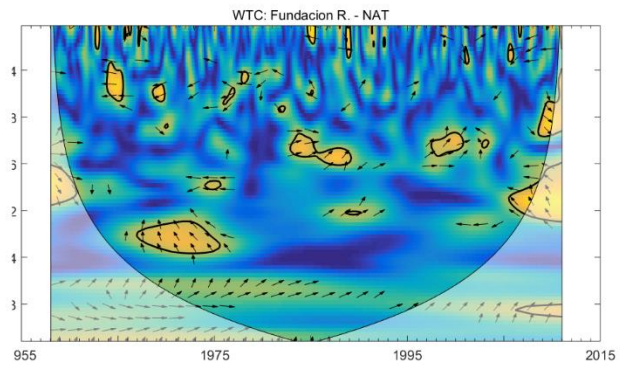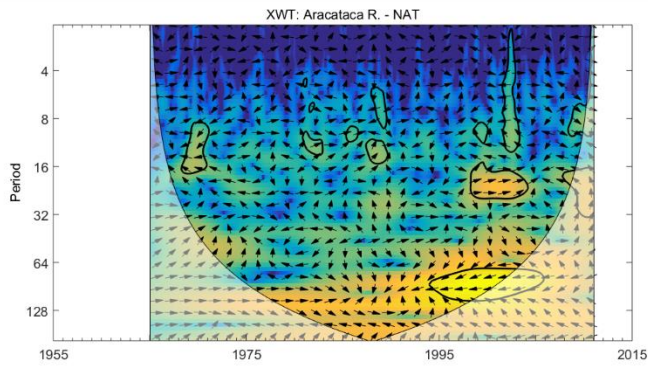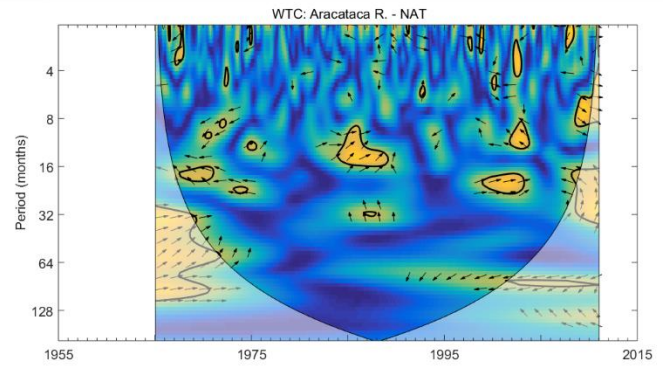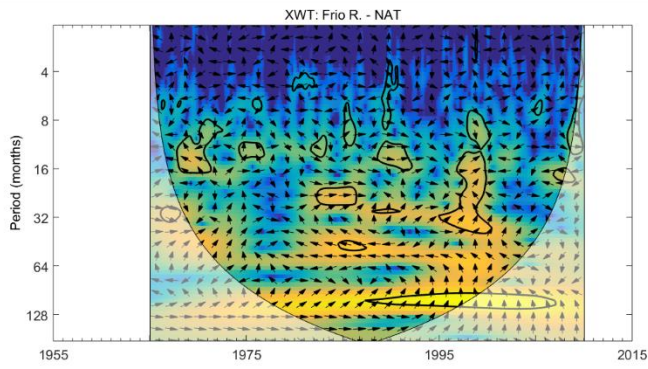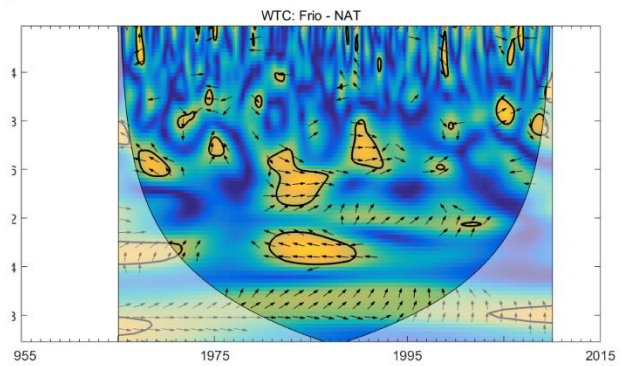

**Fig. S5.** Cross Wavelet Transform (XWT) and Wavelet Coherence (WTC) between NAT and the Fundación, Aracataca, and Frío rivers.

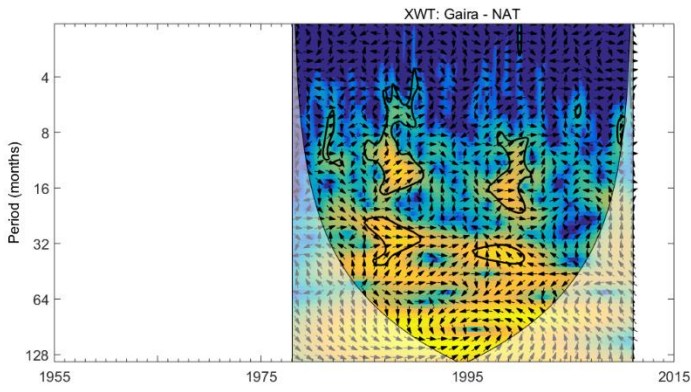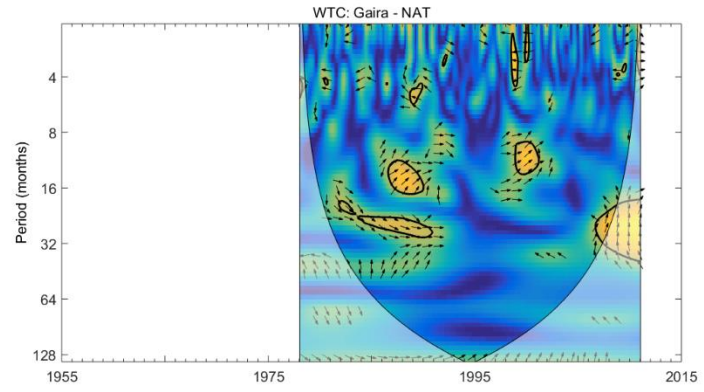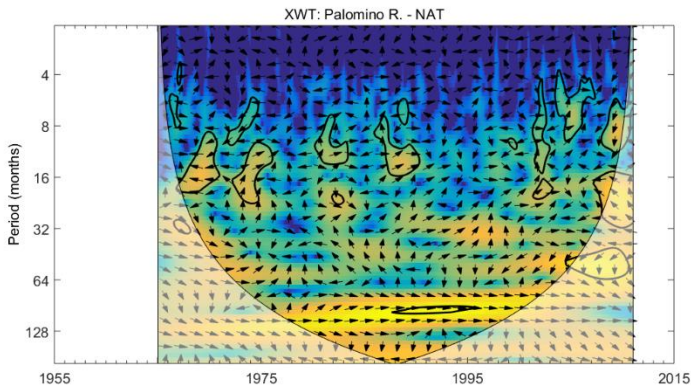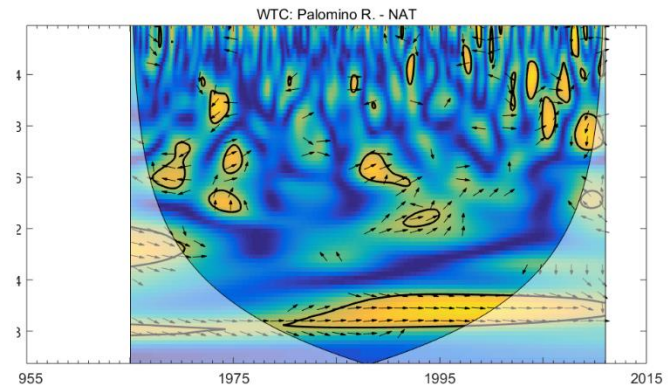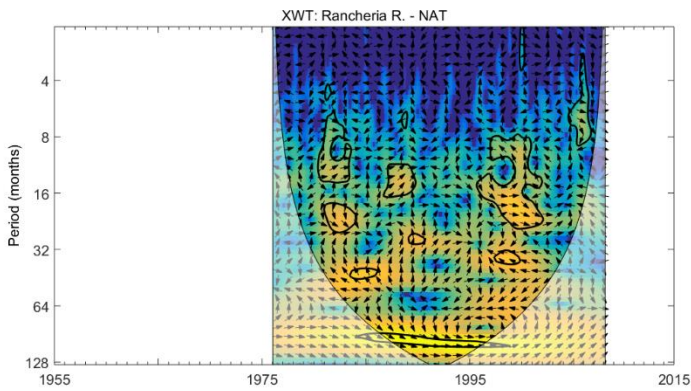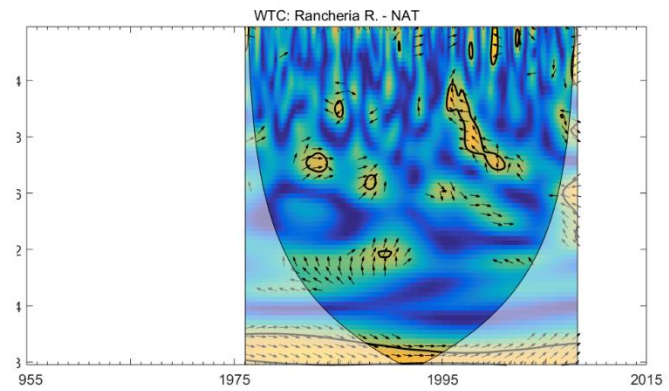

**Fig. S6.** Cross Wavelet Transform (XWT) and Wavelet Coherence (WTC) between NAT and the Gaira, Palomino, and Ranchería rivers.

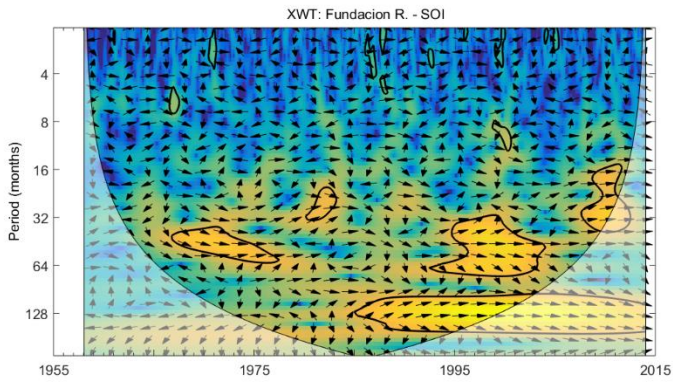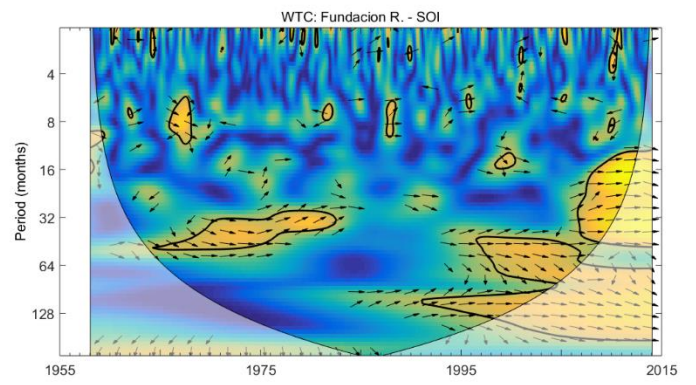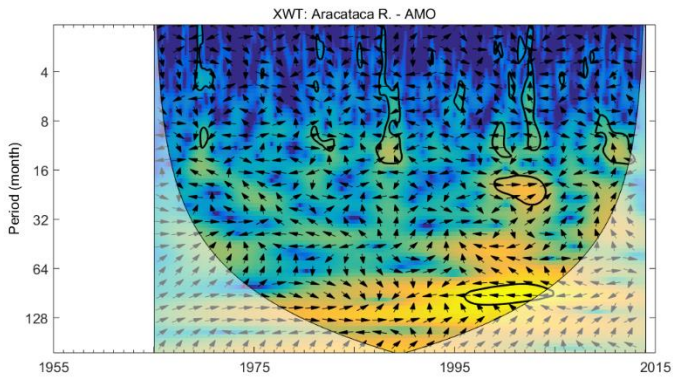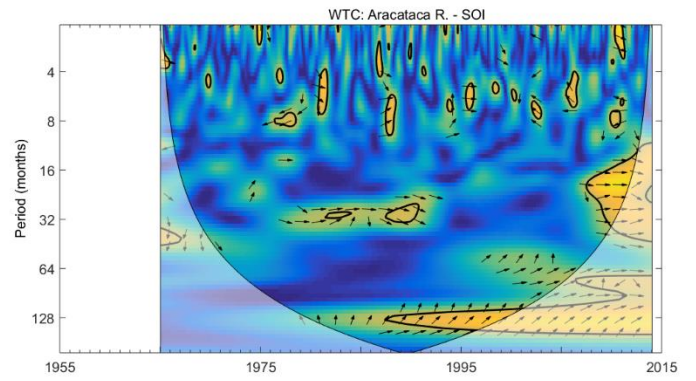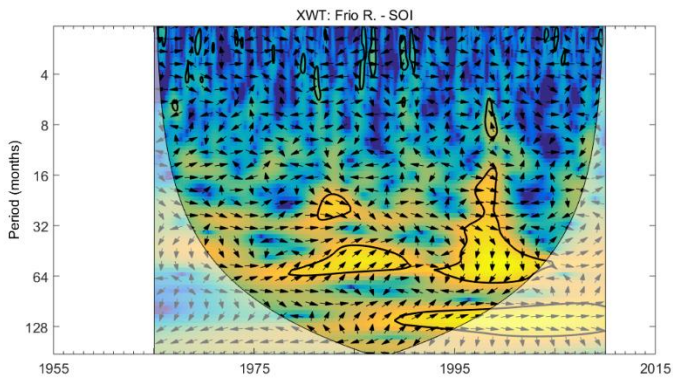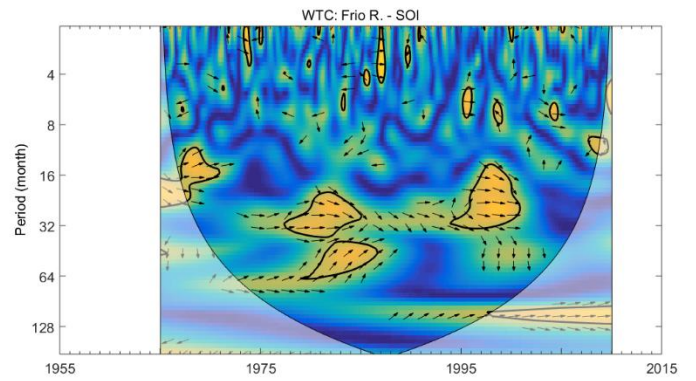

**Fig. S7.** Cross Wavelet Transform (XWT) and Wavelet Coherence (WTC) between SOI and the Fundación, Aracataca, and Frío rivers.



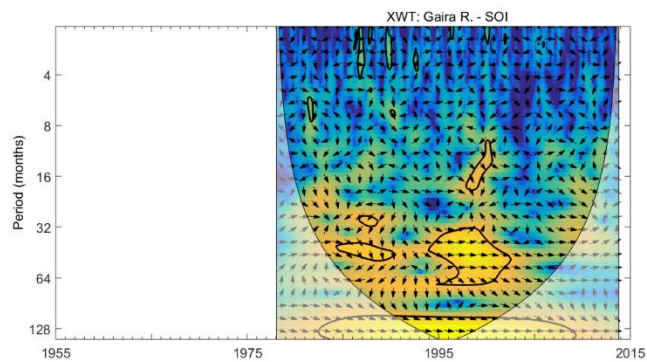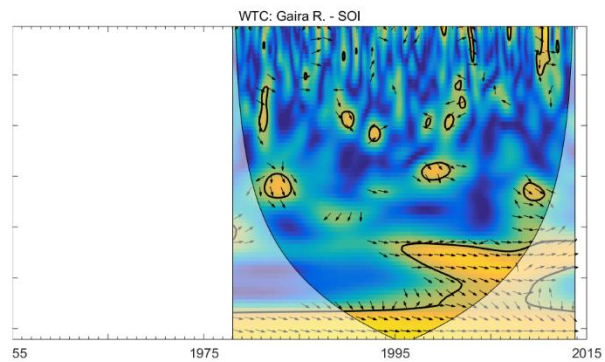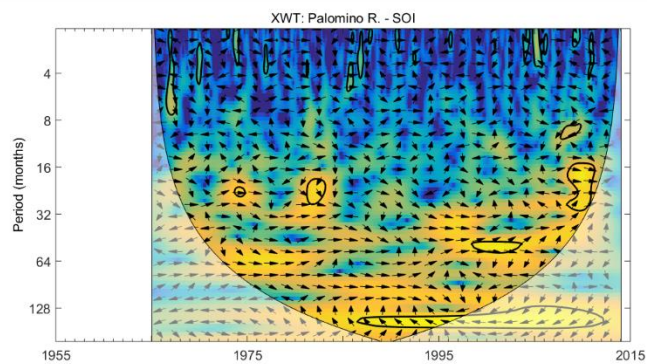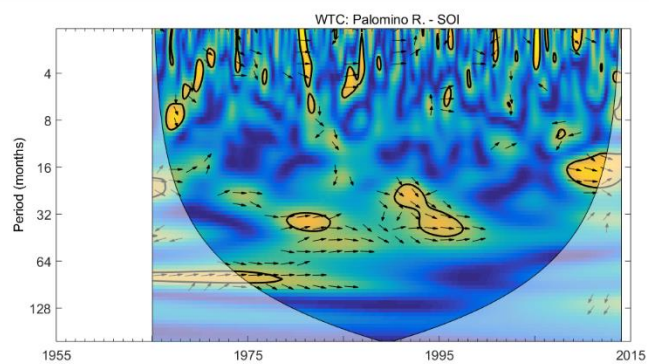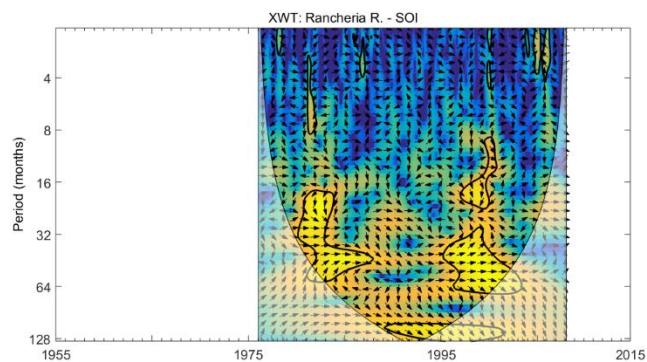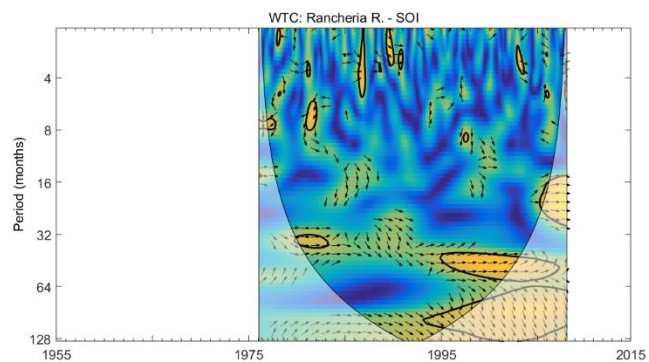

**Fig. S8.** Cross Wavelet Transform (XWT) and Wavelet Coherence (WTC) between SOI and the Gaira, Palomino, and Ranchería rivers.

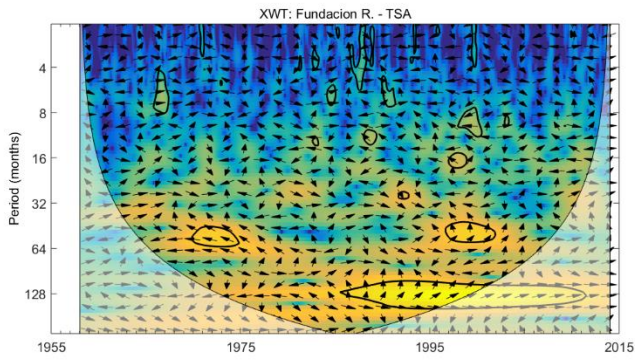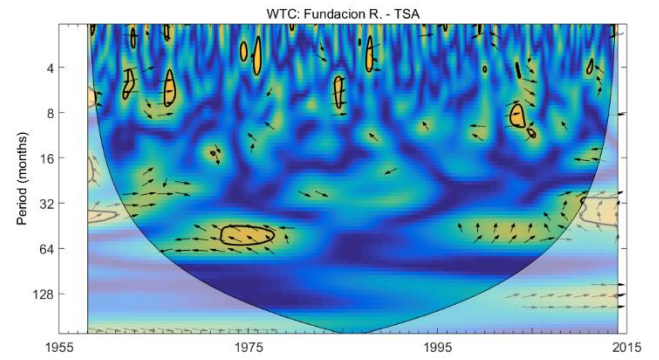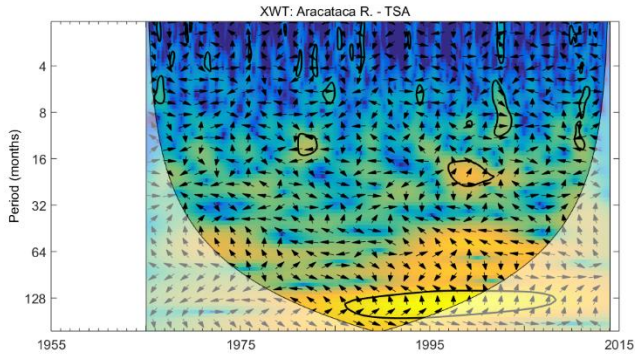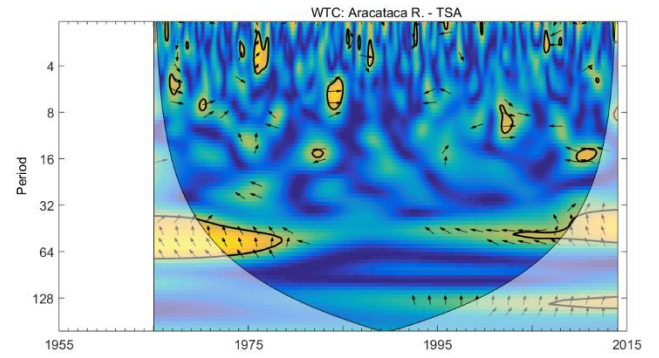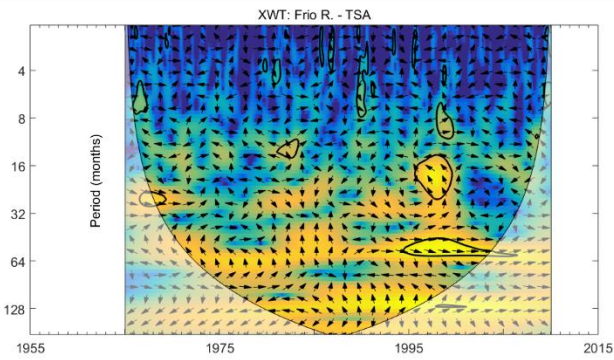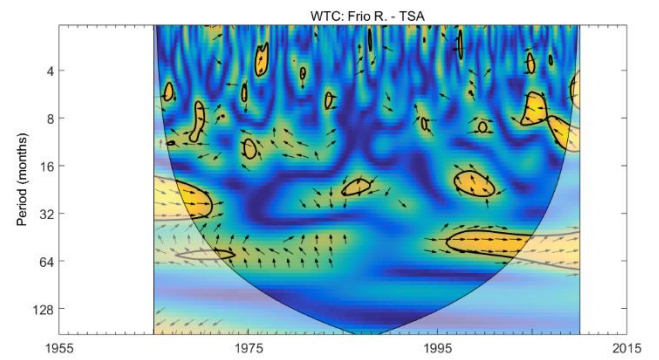

**Fig. S9.** Cross Wavelet Transform (XWT) and Wavelet Coherence (WTC) between TSA and the Fundación, Aracataca, and Frío rivers.

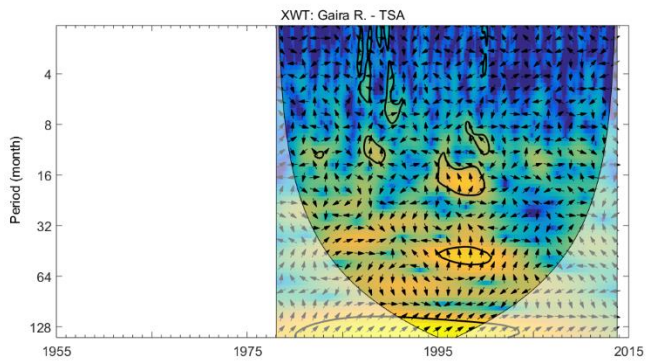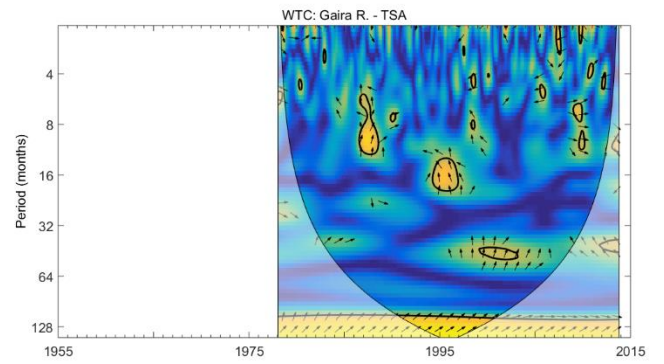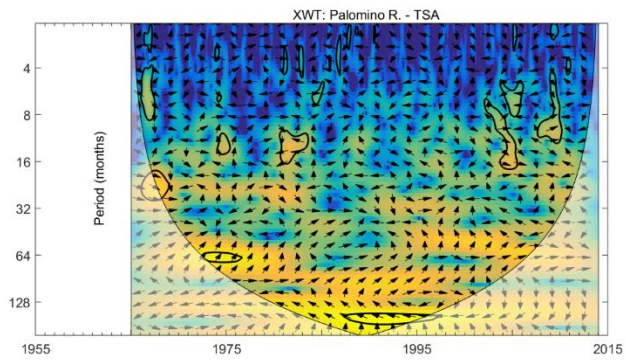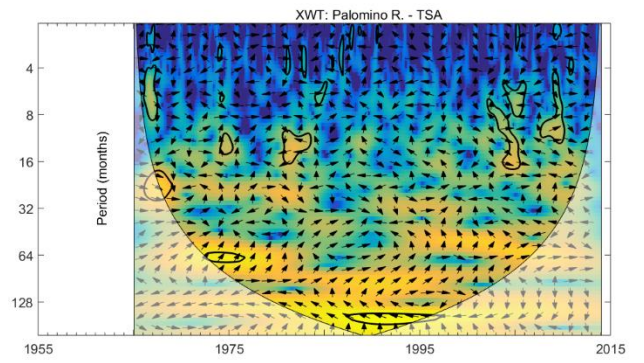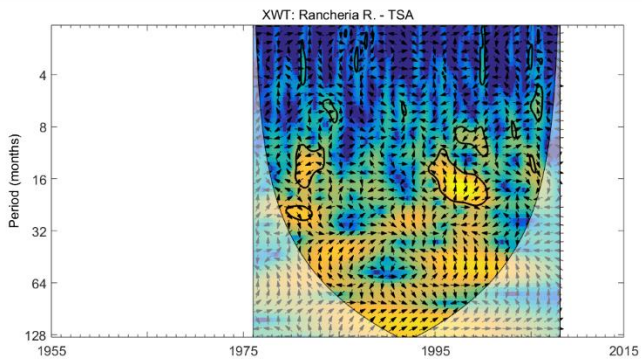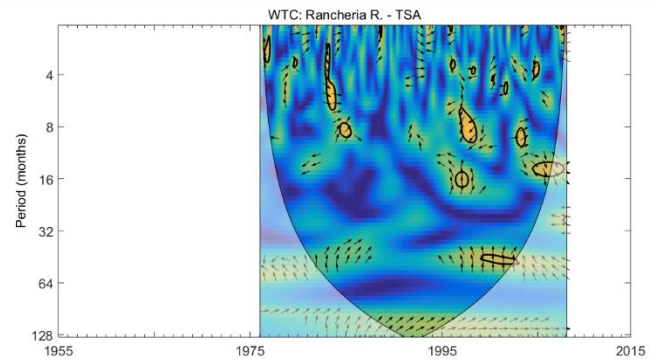

**Fig. S10.** Cross Wavelet Transform (XWT) and Wavelet Coherence (WTC) between TSA and the Gaira, Palomino, and Ranchería rivers.
